# Supplementary material for: A novel method for extracting potassium (K) from K-poor and sodium-rich samples for high-precision stable K isotope analysis
Source: Royal Society of Chemistry journal article supplement (doi:10.1039/d4ja00168k), 2024-01-01
Supplement: d4ja00168k1.pdf [file d4ja00168k1.pdf]

## Electronic Supplementary Information (ESI)

### A novel method for extracting potassium (K) from K-poor and sodium-rich samples for high-precision stable K isotope analysis

Xin-Yuan Zheng

Department of Earth and Environmental Sciences, University of Minnesota–Twin Cities,

Minneapolis MN 55455, USA

[zhengxy@umn.edu](mailto:zhengxy@umn.edu)

**Table S1. Constants used to calculate activity coefficients of K, Na, and TPB ions in high ionic strength solution**

|          | [K <sup>+</sup> ] | [Na <sup>+</sup> ] | [TPB <sup>-</sup> ] |
|----------|-------------------|--------------------|---------------------|
| <b>a</b> | 0                 | 0                  | 1.91                |
| <b>b</b> | 0.0284            | 0.0088             | -4.54               |
| <b>c</b> | -0.219            | -0.0701            | 5.48                |
| <b>d</b> | 0.777             | 0.701              | 0.712               |

Data were taken from McCabe (1996).

**Table S2. K isotope results for a range of reference materials**

|          | $\delta^{41}\text{K}_{\text{NIST 3141a}}$ (‰) | 2SD  | N   | Method         |
|----------|-----------------------------------------------|------|-----|----------------|
| AGV-2a   | -0.45                                         | 0.04 | 8   | collision cell |
| AGV-2a   | -0.46                                         | 0.05 | 3   | cold plasma    |
| BCR-2    | -0.44                                         | 0.05 | 27  | collision cell |
| BCR-2    | -0.44                                         | 0.04 | 6   | cold plasma    |
| GSP-2    | -0.44                                         | 0.05 | 6   | collision cell |
| GSP-2    | -0.41                                         | 0.03 | 2   | cold plasma    |
| seawater | 0.13                                          | 0.04 | 62  | collision cell |
| seawater | 0.13                                          | 0.08 | 6   | cold plasma    |
| UMN-K    | 0.43                                          | 0.04 | 187 | collision cell |
| UMN-K    | 0.45                                          | 0.08 | 32  | cold plasma    |

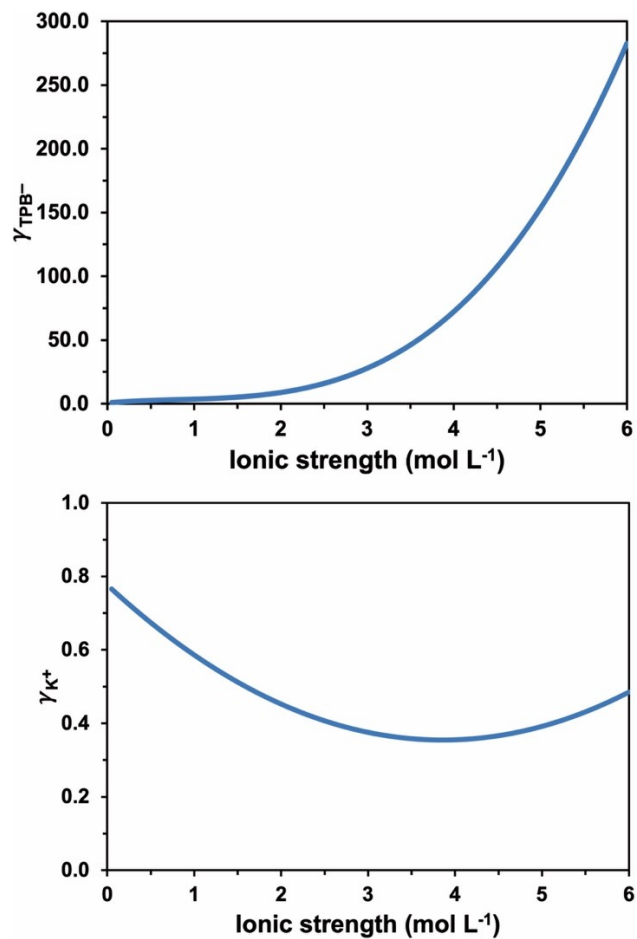

**Fig. S1** Change in activity coefficients for K and TPB ions in a Na–K–TPB system as a function of the solution ionic strength, based on McCabe (1996).

## References

- D. McCabe, *Cesium, potassium, and sodium tetraphenylborate solubility in salt solution*, Savannah River Site (SRS), Aiken, SC (United States), 1996, <https://doi.org/10.2172/626456>.
